# Supplementary figures and images for: Whole‐Transcriptome Sequencing Combined with High‐Dimensional Proteomic Technologies Reveals the Potential Value of miR‐135b‐5p as a Biomarker for Hepatocellular Carcinoma
Source: Hindawi journal article supplement (doi:10.1155/2023/6517963), 2023-01-01

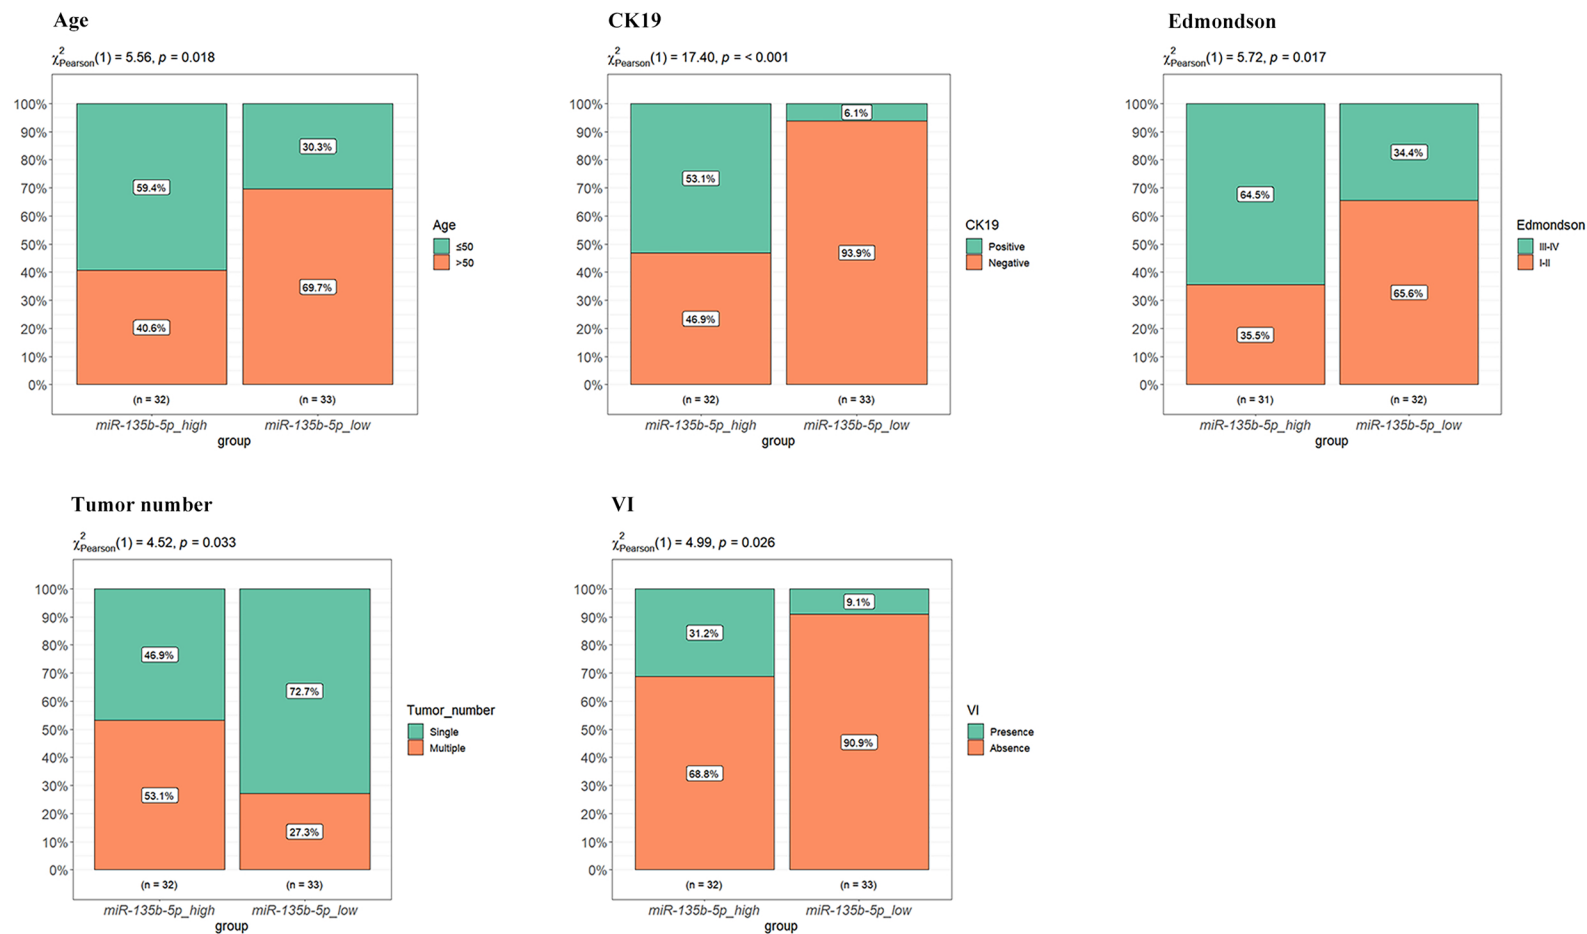

(a)

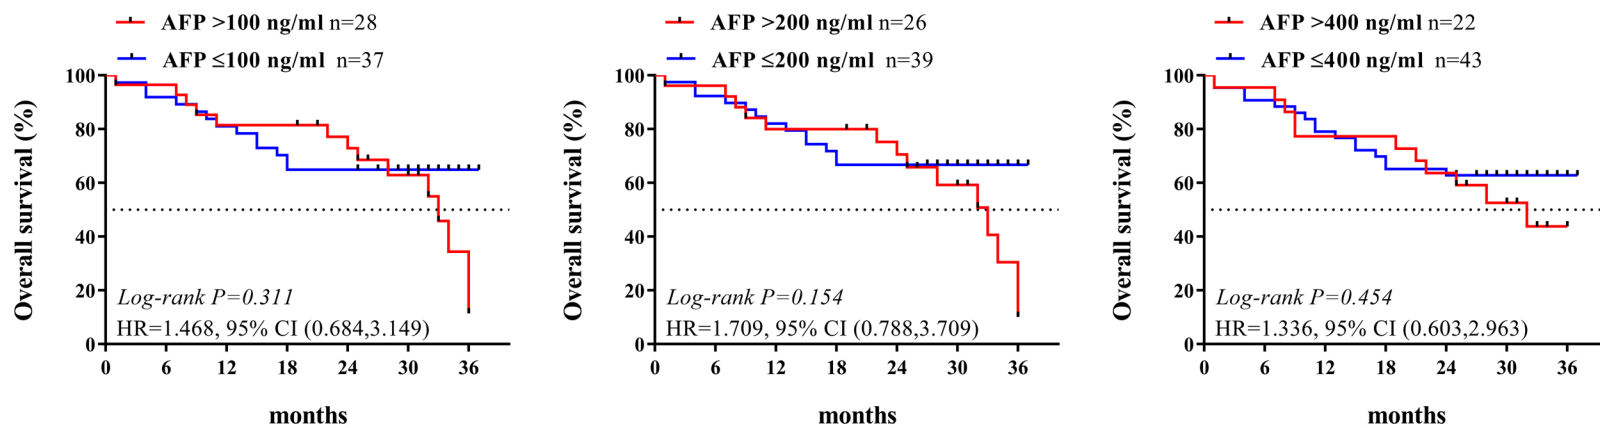

(b)

Supplement: f1 [file 6517963.f1.zip]

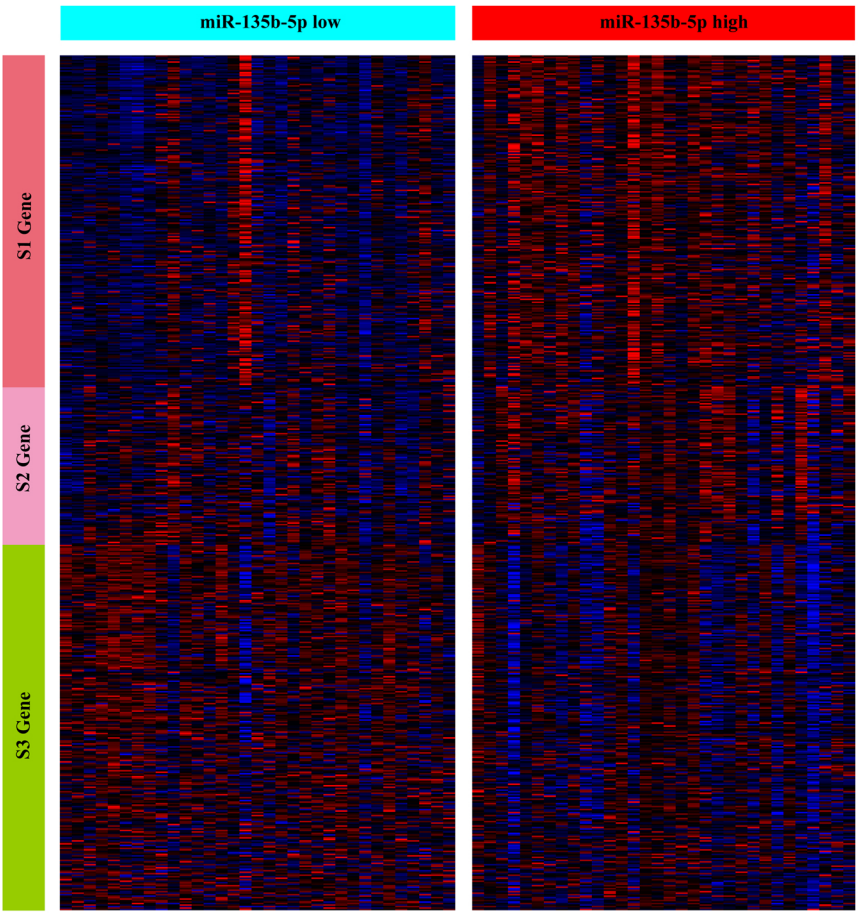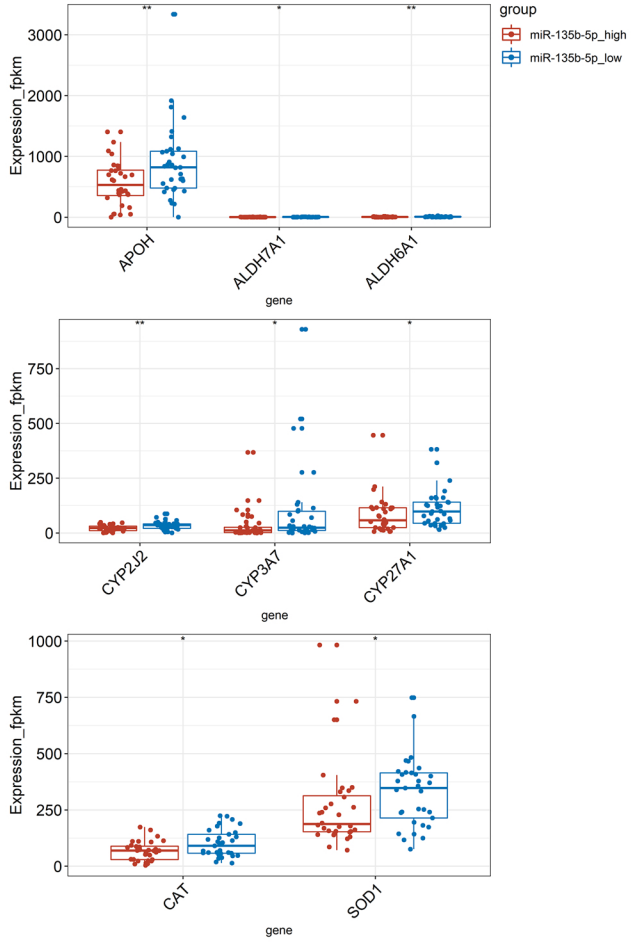

(a)

(b)

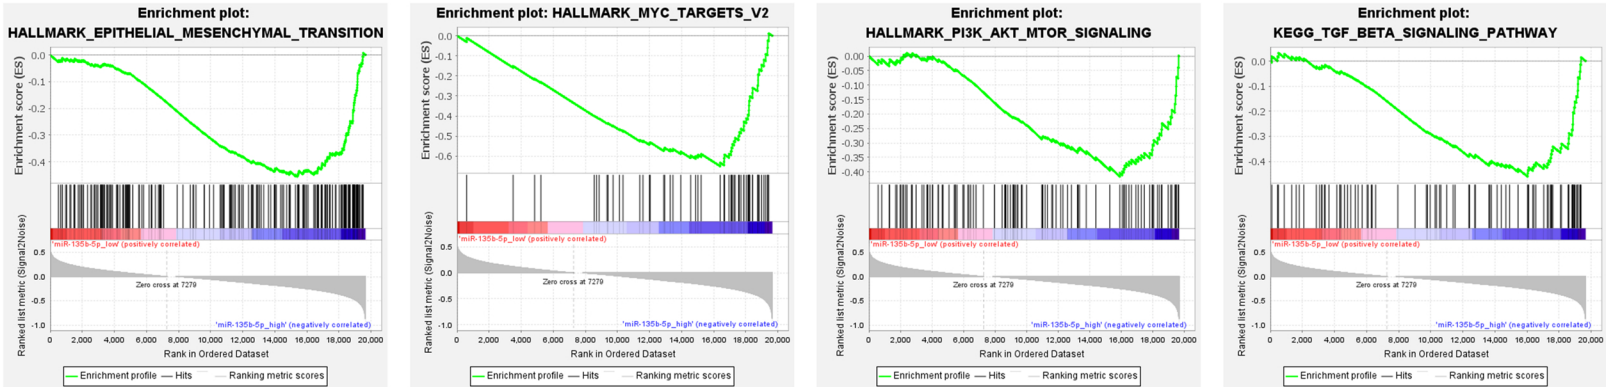

(c)

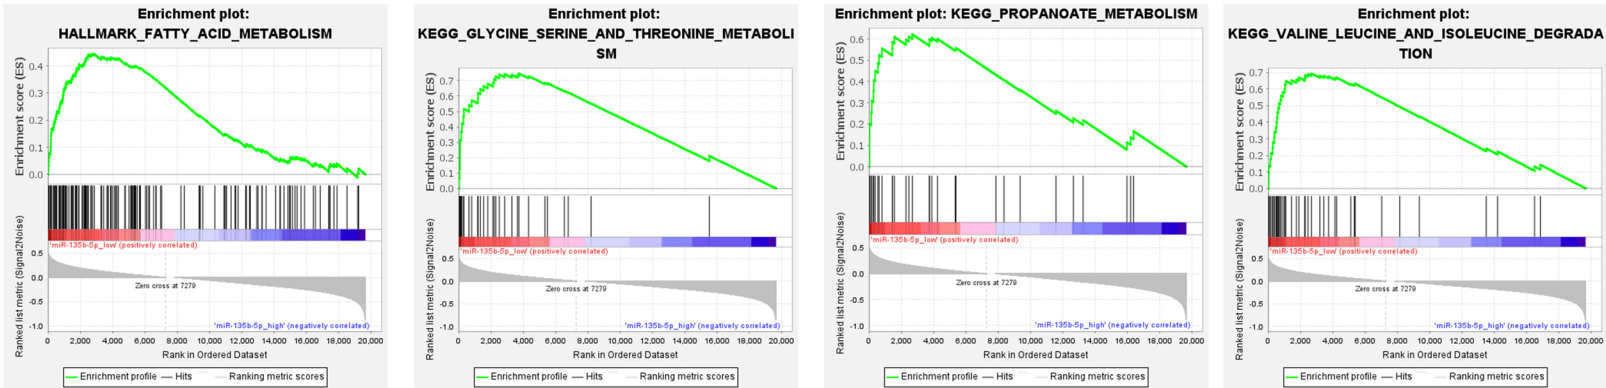

(d)

Supplement: f1 [file 6517963.f1.zip]
